# Supplementary material for: Seeking Sepsis in the Emergency Department- Identifying Barriers to Delivery of the Sepsis 6
Source: PubMed Central journal article supplement — BMJ Qual Improv Rep. 2016 May 5;5(1):u206760.w3983. doi: 10.1136/bmjquality.u206760.w3983 (PMC4863434; doi:10.1136/bmjquality.u206760.w3983), 2016-05-05
Supplement: bmjqir-5-u206760-w3983-s1.pdf [file bmjqir-5-u206760-w3983-s1.pdf]

Figure 1 – Sepsis management protocol

# Ninewells Emergency Department Sepsis Protocol

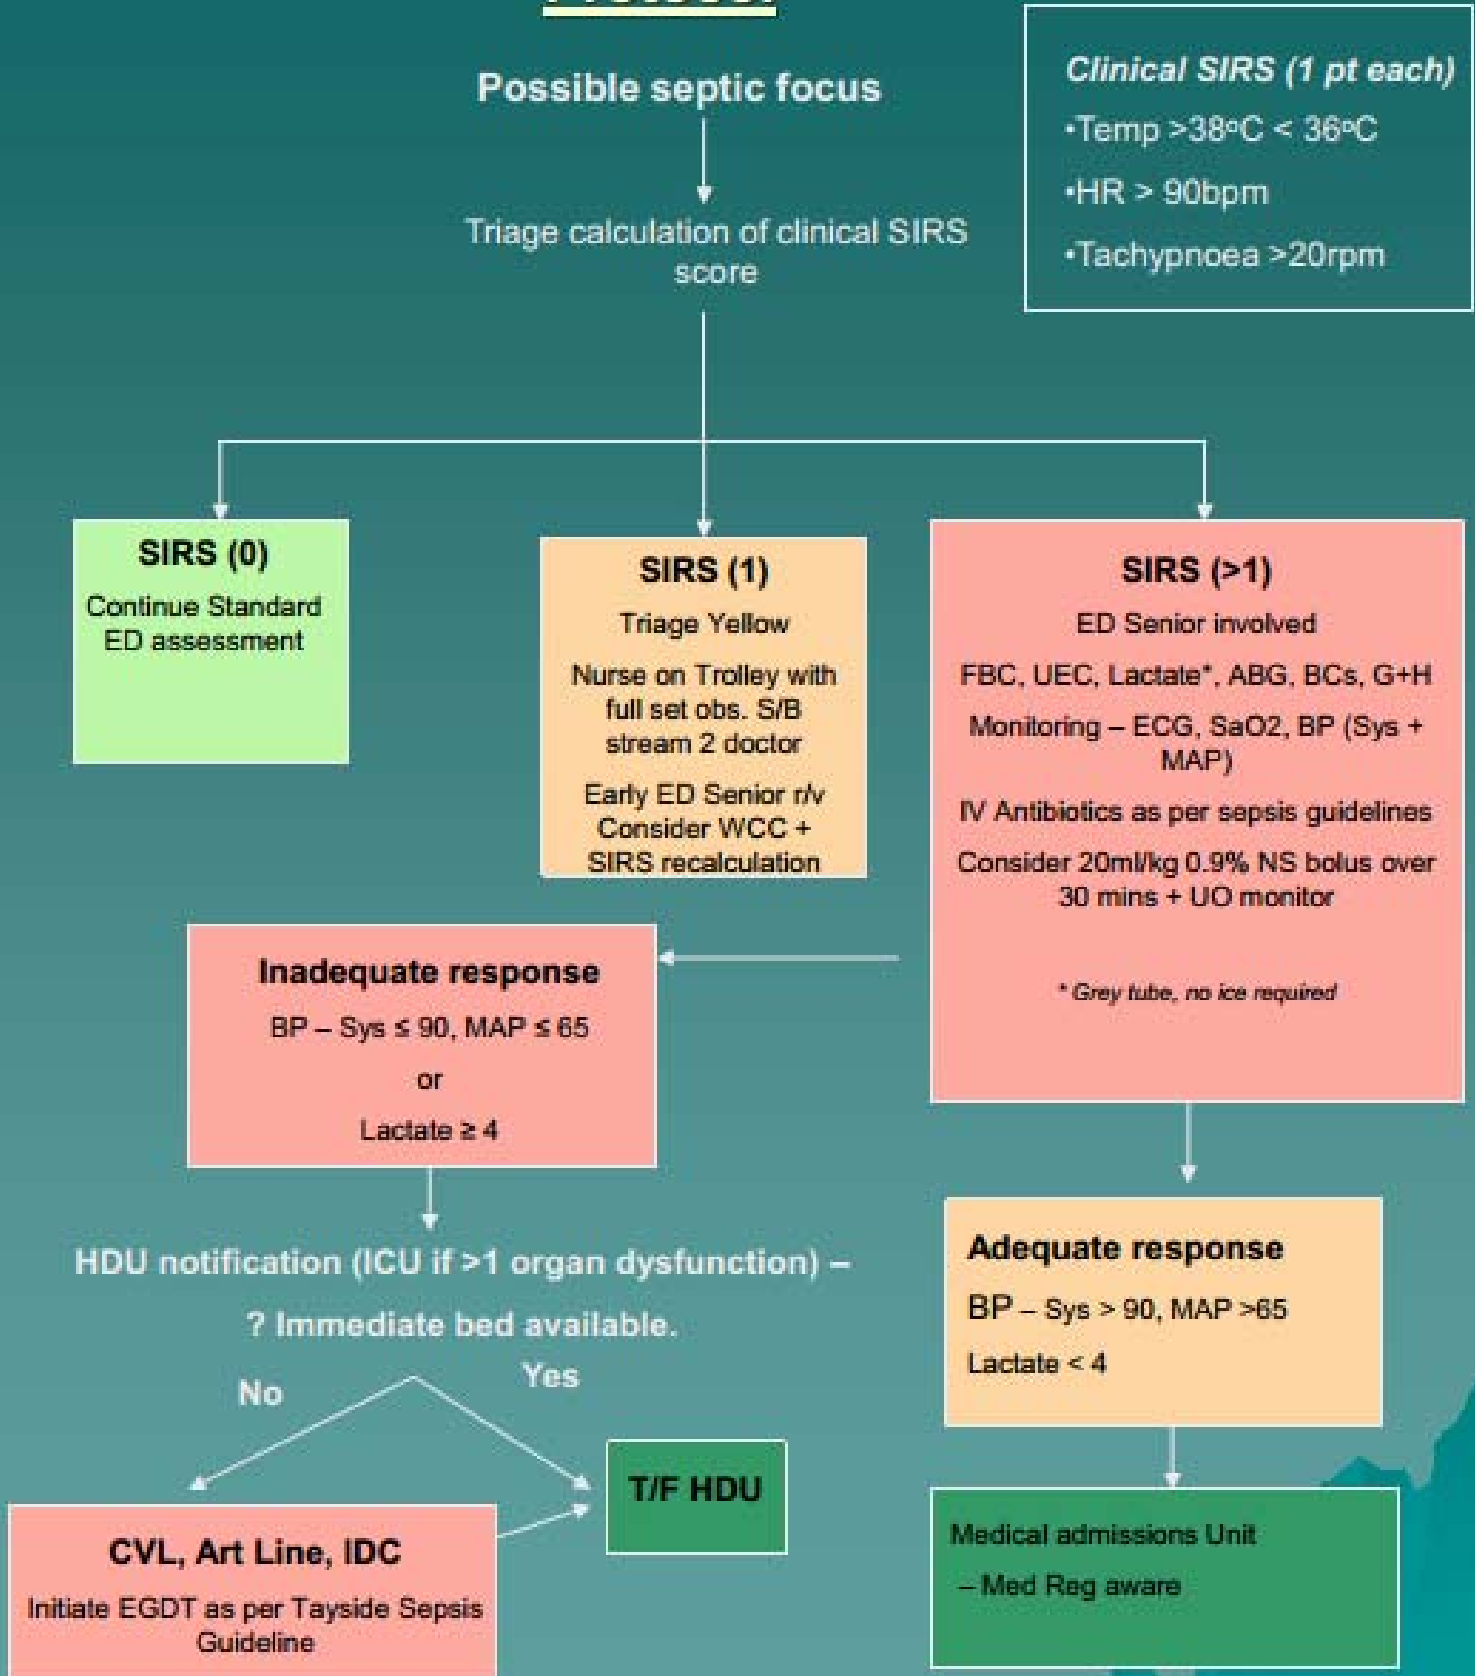

**Figure 2 – Sepsis sticker**

**NHS Tayside Emergency Departments Sepsis Six Bundle**

Name printed here CHI triage time

Initial obs; T 39.4°C HR 137 BP 101/76 RR 36 SIRS 3 SEWS

**Target time** display triage time plus 59 mins  
Tick time or info initials

- |                                                |                          |
|------------------------------------------------|--------------------------|
| 1. Oxygen (if req. to appte SpO <sub>2</sub> ) | <input type="checkbox"/> |
| 2. IV saline                                   | <input type="checkbox"/> |
| 3. Sepsis bloods as per ICE                    | <input type="checkbox"/> |
| 4. Blood cultures                              | <input type="checkbox"/> |
| 5. IV antibiotics (first dose)                 | <input type="checkbox"/> |
| 6. Fluid chart signed                          | <input type="checkbox"/> |
| 7. Move to resuscitation room                  | <input type="checkbox"/> |
| 8. Reviewed by senior doctor                   | <input type="checkbox"/> |

if this patient is septic, treatment should start before a definitive diagnosis is made
