# Supplementary material for: Seeking Sepsis in the Emergency Department- Identifying Barriers to Delivery of the Sepsis 6
Source: PubMed Central journal article supplement — BMJ Qual Improv Rep. 2016 May 5;5(1):u206760.w3983. doi: 10.1136/bmjquality.u206760.w3983 (PMC4863434; doi:10.1136/bmjquality.u206760.w3983), 2016-05-05
Supplement: bmjqir-5-u206760-w3983-s2.pdf [file bmjqir-5-u206760-w3983-s2.pdf]

**Table 1 – Demographics of patients included in baseline and post-QI studies**

|                               | Number in<br>baseline survey | Number on post<br>QI survey |
|-------------------------------|------------------------------|-----------------------------|
| <b>Sex</b><br>(p=0.709)       |                              |                             |
| male                          | 83 (53.5%)                   | 78 (55.7%)                  |
| female                        | 72 (46.5%)                   | 62 (44.3%)                  |
| <b>Age (years)</b><br>p=0.879 |                              |                             |
| range                         | 15-97                        | 14-97                       |
| mean                          | 67                           | 64                          |
| median                        | 71                           | 68                          |

**Table 2 – Sepsis 6 compliance in baseline and post-QI survey with percentage improvement in compliance, assessment times and SEWS scores**

|                                      |                               | Baseline Survey (n=155)    |                                 |                                     |                | Post QI Survey (n=140)     |                                 |                                     |                     | Percentage improvement in compliance     | p value             |
|--------------------------------------|-------------------------------|----------------------------|---------------------------------|-------------------------------------|----------------|----------------------------|---------------------------------|-------------------------------------|---------------------|------------------------------------------|---------------------|
|                                      |                               | Total (% study population) | Compliant (% Factor population) | Non-compliant (% Factor population) | p value        | Total (% study population) | Compliant (% Factor population) | Non-compliant (% Factor population) | p value             |                                          |                     |
| <b>Factor</b>                        | <b>ALL PATIENTS</b>           | <b>155 (100%)</b>          | <b>79 (51.0%)</b>               | <b>76 (49.0%)</b>                   | <b>p=0.810</b> | <b>140 (100%)</b>          | <b>104 (74.3%)</b>              | <b>36 (25.7%)</b>                   | <b>p&lt;0.001**</b> | <b>45.7%</b>                             | <b>p&lt;0.001**</b> |
|                                      | <b>Time</b>                   |                            |                                 |                                     | p=0.304        |                            |                                 |                                     | p=0.921             |                                          | 0.4                 |
|                                      | <b>In-hours</b>               | 49 (31.6%)                 | 22 (44.9%)                      | 27(55.1%)                           |                | 38 (27.1%)                 | 28 (73.7%)                      | 10 (26.3%)                          |                     | 64.1%                                    |                     |
|                                      | <b>Out-of-hours</b>           | 106 (68.4%)                | 57 (53.8%)                      | 49 (46.2%)                          |                | 102 (72.9%)                | 76 (74.5%)                      | 26 (25.5%)                          |                     | 38.6%                                    |                     |
|                                      | <b>Area</b>                   |                            |                                 |                                     | p=0.009**      |                            |                                 |                                     | p=0.592             |                                          | p=0.615             |
|                                      | <b>Resus</b>                  | 113 (72.9%)                | 66 (58.4%)                      | 47 (41.6%)                          |                | 109 (77.9%)                | 83 (76.1%)                      | 26 (23.9%)                          |                     | 30.4%                                    |                     |
|                                      | <b>Treatment bay</b>          | 11 (7.1%)                  | 4 (36.4%)                       | 7 (63.6%)                           |                | 8 (5.7%)                   | 5 (62.5%)                       | 3 (37.5%)                           |                     | 71.9%                                    |                     |
|                                      | <b>Treatment bay to Resus</b> | 31 (20.0%)                 | 9 (29.0%)                       | 22 (71.0%)                          |                | 23 (16.4%)                 | 16 (69.6%)                      | 7 (30.4%)                           |                     | 139.7%                                   |                     |
|                                      | <b>Temperature</b>            |                            |                                 |                                     | p<0.001**      |                            |                                 |                                     | p=0.001**           |                                          | p=0.08              |
|                                      | <b>38°C or over</b>           | 130 (83.9%)                | 75 (57.7%)                      | 55 (42.3%)                          |                | 106 (75.7%)                | 86 (81.1%)                      | 20 (18.9%)                          |                     | 40.6%                                    |                     |
| <b>Less than 38°C</b>                | 25 (16.1%)                    | 4 (16.0%)                  | 21 (84.0%)                      |                                     | 34 (24.3%)     | 18 (52.9%)                 | 16 (47.1%)                      |                                     | 230.9%              |                                          |                     |
| <b>SIRS Score</b>                    |                               |                            |                                 | p=0.127                             |                |                            |                                 | p=0.145                             |                     | p=0.172                                  |                     |
|                                      | <b>SIRS 2</b>                 | 54 (34.8%)                 | 23 (42.6%)                      | 31 (57.4%)                          |                | 57 (40.7%)                 | 38 (66.7%)                      | 19 (33.3%)                          |                     | 56.5%                                    |                     |
|                                      | <b>SIRS 3</b>                 | 101 (65.1%)                | 56 (55.4%)                      | 45 (44.6%)                          |                | 81 (57.9%)                 | 65 (80.2%)                      | 16 (19.8%)                          |                     | 44.8%                                    |                     |
|                                      |                               | <b>All patients</b>        | <b>Compliant</b>                | <b>Non-compliant</b>                |                | <b>All patients</b>        | <b>Compliant</b>                | <b>Non-compliant</b>                |                     | <b>Difference for compliant patients</b> |                     |
| <b>Times to assessment (minutes)</b> |                               |                            |                                 |                                     |                |                            |                                 |                                     |                     |                                          |                     |
|                                      | <b>first medical (mean)</b>   | 9.5                        | 2.7                             | 16.6                                | p<0.001**      | 9.7                        | 8.6                             | 12.8                                | p=0.051             | 5.9                                      | p=0.183             |
|                                      | <b>first medical (median)</b> | 6.0                        | 3.0                             | 12.0                                |                | 7.0                        | 6.0                             | 10.0                                |                     | 3.0                                      |                     |
|                                      | <b>Senior (mean)</b>          | 15.3                       | 7.0                             | 25.6                                | p<0.001**      | 21.0                       | 18.5                            | 28.4                                | p=0.119             | 11.5                                     | p=0.011             |
|                                      | <b>Senior (median)</b>        | 7.0                        | 0.0                             | 25.0                                |                | 15.0                       | 13.0                            | 26.0                                |                     | 13.0                                     |                     |
| <b>SEWS score</b>                    |                               |                            |                                 |                                     |                |                            |                                 |                                     |                     |                                          |                     |
|                                      | <b>Mean SEWS score</b>        | 6                          | 6                               | 6                                   | p=0.077        | 6                          | 6                               | 5                                   | p=0.131             | 0                                        | p=0.05*             |
|                                      | <b>Median SEWS Score</b>      | 6                          | 6                               | 5                                   |                | 5                          | 6                               | 5                                   |                     | 0                                        |                     |

**Table 3 – The number of patients and proportions who achieved each bundle element in baseline and post-QI surveys**

|                       | Baseline survey |                        | Post-QI survey |                        | Percentage change for all patients | p value   | Percentage change for non-compliant patients |
|-----------------------|-----------------|------------------------|----------------|------------------------|------------------------------------|-----------|----------------------------------------------|
|                       | All patients    | Non-compliant patients | All patients   | Non-compliant patients |                                    |           |                                              |
| <b>Bundle element</b> |                 |                        |                |                        |                                    |           |                                              |
| <b>Oxygen</b>         | 148 (95.5%)     | 69 (90.8%)             | 140 (100%)     | 36 (100%)              | 4.7%                               | p=0.002** | 10.1%                                        |
| <b>Fluid</b>          | 120 (77.4%)     | 41 (53.9%)             | 120 (86.4%)    | 17 (47.2%)             | 11.6%                              | p=0.097   | -12.4%                                       |
| <b>Cultures</b>       | 127 (81.9%)     | 48 (63.2%)             | 125 (89.3%)    | 21 (58.3%)             | 9.0%                               | p=0.008** | -7.8%                                        |
| <b>Antibiotics</b>    | 103 (66.5%)     | 24 (31.6%)             | 120 (85.7%)    | 16 (44.4%)             | 28.9%                              | p=0.074   | 40.5%                                        |
| <b>Lactate</b>        | 128 (82.6%)     | 49 (64.5%)             | 130 (92.9%)    | 26 (72.2%)             | 12.4%                              | p<0.001** | 11.9%                                        |
